# Supplementary material for: Oxygen-vacancy-rich BiOCl materials with ultrahigh photocatalytic efficiency by etching bismuth glass
Source: Royal Society of Chemistry journal article supplement (doi:10.1039/d1ra06961f), 2021-01-01
Supplement: d1ra06961f1.pdf [file d1ra06961f1.pdf]

## Oxygen-Vacancy-Rich BiOCl Materials with Ultra-High Photocatalysis Efficiency by Etching Bismuth Glass

Wenjing Dong<sup>a,b</sup>, Tianyi Xie<sup>a</sup>, Zhilun Wu<sup>d</sup>, Haiyi Peng<sup>a</sup>, Haishen Ren<sup>a</sup>, Fancheng Meng<sup>c,\*</sup>,  
Huixing Lin<sup>a,b,\*</sup>

a. Key Laboratory of Inorganic Functional Materials and Devices, Shanghai Institute of  
Ceramics, Chinese Academy of Sciences, Shanghai 201800, China.

b. Education Ministry Key Lab of Resource Chemistry and Shanghai Key Laboratory of Rare  
Earth Functional Materials, Shanghai Normal University, Shanghai, 200234,  
China

c. College of Materials Science and Engineering, Chongqing University of Technology,  
Chongqing 400054, China

d. United Microelectronics Center LTD

Corresponding authors: [mengfancheng@cqut.edu.cn](mailto:mengfancheng@cqut.edu.cn), [huixinglin@mail.sic.ac.cn](mailto:huixinglin@mail.sic.ac.cn)

1. **Figure S1.** Schematic diagram illustrating formation process of as-prepared BiOCl samples.
2. **Figure S2.** Nitrogen adsorption-desorption isotherm of as-prepared BiOCl samples.
3. **Figure S3.** Cyclic photocatalytic RhB degradation test using flower-shaped BiOCl-NaCl.
4. **Table S1.** Parameters showing XPS result of as-prepared BiOCl samples.
5. **Table S2.** Comparison with respect to specific surface area, average pore size and pore volume of as-prepared BiOCl samples.
6. **Table S3.** Pseudo-first-order rate constant for RhB photocatalytic oxidation using different photocatalysts.
7. **Table S4.** Comparison of the obtained specific surface area and photocatalysis performance results with literature data of the catalysts.

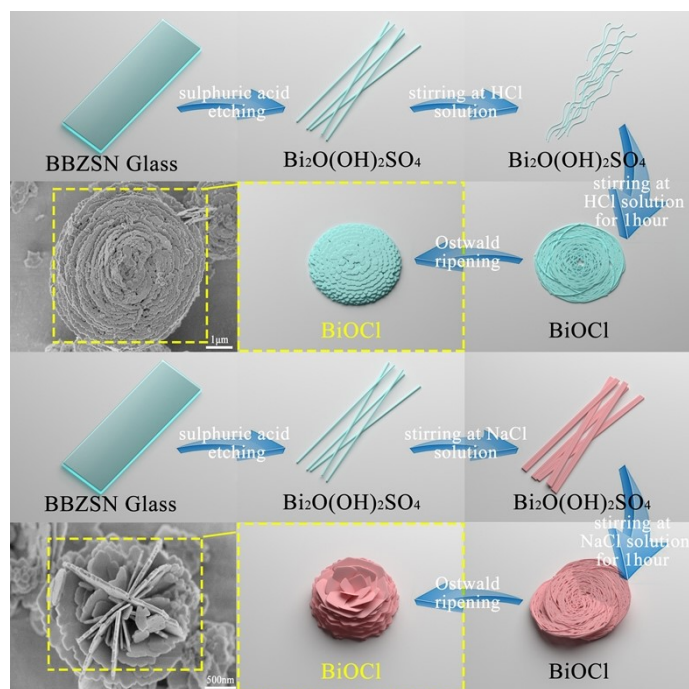

**Figure S1.** Schematic diagram illustrating formation process of as-prepared BiOCl samples.

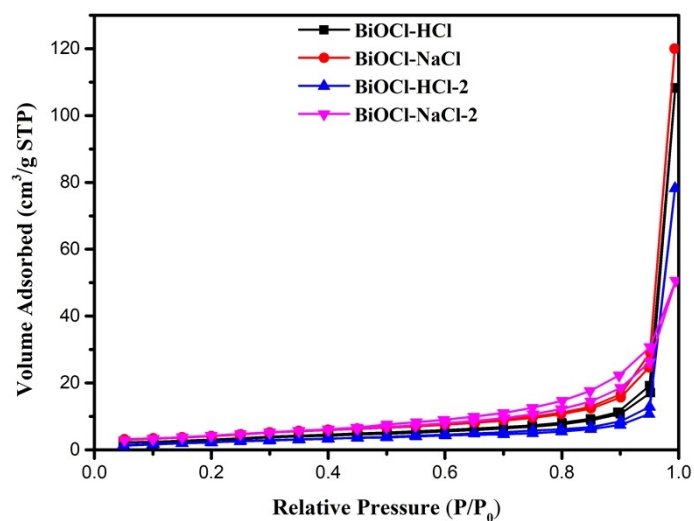

**Figure S2.** Nitrogen adsorption-desorption isotherm of as-prepared BiOCl samples.

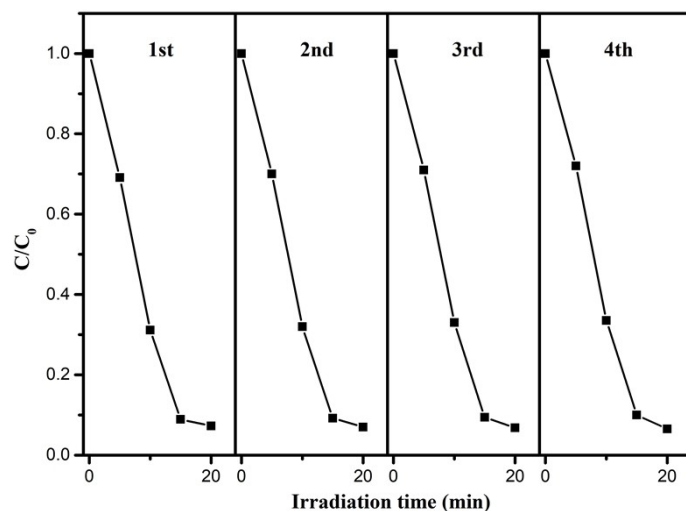

**Figure S3.** Cyclic photocatalytic RhB degradation test using flower-shaped BiOCl-NaCl.

**Table S1.** Parameters showing XPS result of as-prepared BiOCl samples.

|              | Bi 4f | Cl 2p | O 1s  | C 1s  |
|--------------|-------|-------|-------|-------|
| BiOCl-HCl    | 16.88 | 18.39 | 29.55 | 35.17 |
| BiOCl-NaCl   | 15.51 | 16.55 | 31.4  | 36.55 |
| BiOCl-HCl-2  | 13.69 | 13.85 | 35.8  | 36.66 |
| BiOCl-NaCl-2 | 15.69 | 16.36 | 40.96 | 26.98 |

**Table S2.** Comparison with respect to specific surface area, average pore size and pore volume of as-prepared BiOCl samples.

| Sample       | S <sub>BET</sub> (m <sup>2</sup> /g) | Average pore size (nm) | Pore volume (cm <sup>3</sup> /g) |
|--------------|--------------------------------------|------------------------|----------------------------------|
| BiOCl-HCl    | 10.996                               | 322.1                  | 0.167                            |
| BiOCl-NaCl   | 16.094                               | 292.3                  | 0.186                            |
| BiOCl-HCl-2  | 8.795                                | 312.1                  | 0.121                            |
| BiOCl-NaCl-2 | 16.683                               | 363.9                  | 0.078                            |

**Table S3.** Pseudo-first-order rate constant for RhB photocatalytic oxidation using different photocatalysts.

| Sample       | $k_{uv}(\text{min}^{-1})$ | $k_{vis}(\text{min}^{-1})$ |
|--------------|---------------------------|----------------------------|
| BiOCl-HCl    | 0.13707                   | 0.01266                    |
| BiOCl-NaCl   | 0.16016                   | 0.01658                    |
| BiOCl-HCl-2  | 0.07892                   | 0.00793                    |
| BiOCl-NaCl-2 | 0.1218                    | 0.02221                    |

**Table S4.** Comparison of the obtained specific surface area and photocatalysis performance results with literature data of the catalysts.

| Materials  | $S_{BET}$<br>( $\text{m}^2/\text{g}$ ) | Catalyst<br>Amount | Pollutant<br>content(RhB) | Light Type                                                                                       | Degradation Rate                                    | Ref.         |
|------------|----------------------------------------|--------------------|---------------------------|--------------------------------------------------------------------------------------------------|-----------------------------------------------------|--------------|
| BiOCl-NaCl | 16.094                                 | 10mg               | 10mg/L<br>100ml           | Ultraviolet<br>light( $\lambda < 400\text{nm}$ )<br>Visible<br>light( $\lambda > 400\text{nm}$ ) | 92.7% in 20min<br>71.4% in 20min<br>92.8% in 100min | This<br>work |
| BiOCl      | -                                      | 50mg               | 20mg/L<br>100ml           | Ultraviolet<br>light( $\lambda < 420\text{nm}$ )                                                 | 90% in 140 min                                      | 1            |

|                                                |       |       |        |                                           |                   |    |
|------------------------------------------------|-------|-------|--------|-------------------------------------------|-------------------|----|
| BiOCl                                          | 5.6   | 30mg  | 10mg/L | UV-vis light<br>(200nm< $\lambda$ <800nm) | 98.1% in 195 min  | 19 |
|                                                |       |       | 100ml  |                                           |                   |    |
| BiOCl/TU                                       | 56.07 | 20mg  | 20mg/L | Visible<br>light( $\lambda$ >420nm)       | 95% in 20 min     | 20 |
|                                                |       |       | 50ml   |                                           |                   |    |
| BiOCl                                          | -     | 20mg  | 20mg/L | Ultraviolet<br>light( $\lambda$ <420nm)   | 100% in 120 min   | 60 |
|                                                |       |       | 30ml   |                                           |                   |    |
| BiOCl/PVP                                      | 23.8  | 20mg  | 20mg/L | Ultraviolet<br>light( $\lambda$ <380nm)   | 97% in 40 min     | 61 |
|                                                |       |       | 30ml   |                                           |                   |    |
| BiOCl/Eu <sup>3+</sup>                         | -     | 10mg  | 20mg/L | Ultraviolet<br>light( $\lambda$ =360nm)   | 100% in 120 min   | 62 |
|                                                |       |       | 30ml   |                                           |                   |    |
| BiOCl/<br>ZnSn(OH) <sub>6</sub>                | -     | 100mg | 48mg/L | Visible<br>light( $\lambda$ >420nm)       | 94.1% in 120 min  | 63 |
|                                                |       |       | 100ml  |                                           |                   |    |
| BiOCl/<br>CTAB                                 | -     | 10mg  | 10mg/L | Visible<br>light( $\lambda$ >420nm)       | 99.7% in 180 min  | 64 |
|                                                |       |       | 100ml  |                                           |                   |    |
| p-BiOCl/<br>n-ZnFe <sub>2</sub> O <sub>4</sub> | -     | 50mg  | 10mg/L | Visible<br>light( $\lambda$ >420nm)       | 97% in 180 min    | 65 |
|                                                |       |       | 50ml   |                                           |                   |    |
| BiOCl/TiO <sub>2</sub> /<br>Clinoptilolite     | 43.93 | 100mg | 10mg/L | Visible<br>light( $\lambda$ >420nm)       | 98.03% in 360 min | 66 |
|                                                |       |       | 100ml  |                                           |                   |    |

---
